# Supplementary material for: Studies on staged precipitation of cellulose from an ionic liquid by compressed carbon dioxide
Source: Royal Society of Chemistry journal article supplement (doi:10.1039/c4gc00085d), 2014-01-01
Supplement: c4gc00085d1.pdf [file c4gc00085d1.pdf]

## Electronic Supplementary Information

### **Studies on staged precipitation of cellulose from ionic liquid by compressed carbon dioxide**

**Xiaofu Sun,<sup>a</sup> Yanling Chi<sup>b</sup> and Tiancheng Mu<sup>\*a</sup>**

<sup>a</sup> Department of Chemistry, Renmin University of China, Beijing, 100872, China. Fax: (+) 86-10-62516444, E-mail: [tcmu@chem.ruc.edu.cn](mailto:tcmu@chem.ruc.edu.cn).

<sup>b</sup> Materials Science and Engineering College, Northeast Forestry University, Harbin, 150040, China

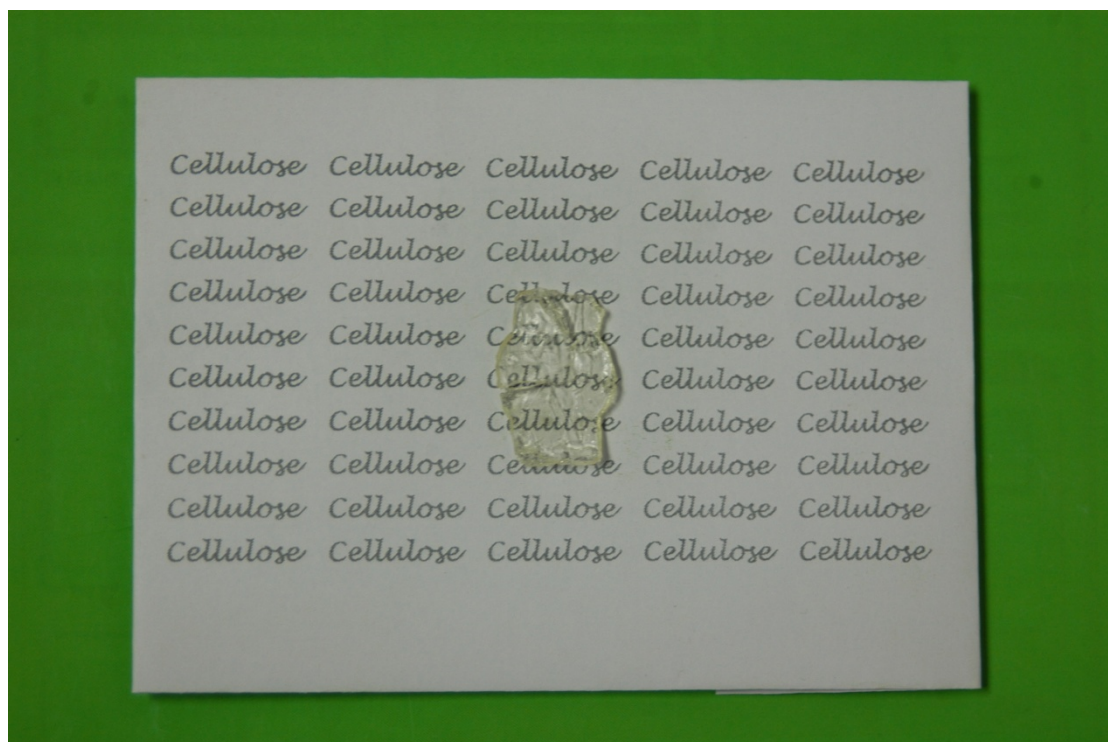

**Fig. S1** Picture illustrating the transparent regenerated cellulose obtained from 10 wt% MCC/[Bmim]OAc solution by adding compressed CO<sub>2</sub> (25°C, 6.60 MPa) for 1 h.

**Table S1.** The yield and DP value of the regenerated cellulose from [Bmim]OAc/MCC (10 wt%) and [Bmim]OAc/co-solvent (1:1(w/w))/MCC (10 wt%) by using compressed CO<sub>2</sub> (6.6 MPa, 25 °C).

| Entry. | Co-solvent | Reaction time | Yield / % | DP value |
|--------|------------|---------------|-----------|----------|
| 1      | --         | 1             | 17.1      | 217      |
| 2      | --         | 2             | 34.5      | 208      |
| 3      | --         | 3             | 58.2      | 202      |
| 4      | --         | 4             | 58.7      | 203      |
| 5      | DMSO       | 1             | 37.0      | 206      |
| 6      | DMSO       | 2             | 63.3      | 175      |
| 7      | DMSO       | 3             | 63.7      | 173      |
| 8      | DMSO       | 4             | 64.1      | 170      |
| 9      | DMI        | 1             | 35.1      | 206      |
| 10     | DMI        | 2             | 62.7      | 178      |
| 11     | DMI        | 3             | 62.9      | 177      |
| 12     | DMI        | 4             | 63.3      | 174      |
| 13     | DMF        | 1             | 33.7      | 210      |
| 14     | DMF        | 2             | 61.0      | 188      |
| 15     | DMF        | 3             | 61.3      | 185      |
| 16     | DMF        | 4             | 61.7      | 180      |

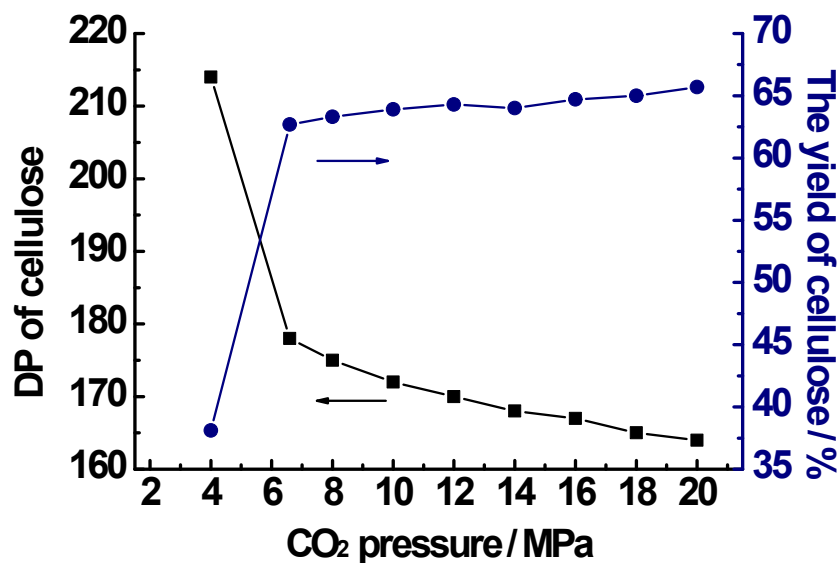

**Fig. S2** The DP value and yield of the regenerated cellulose obtained from the system of [Bmim]OAc/DMI (1:1(w/w))/MCC (10 wt%) by using compressed CO<sub>2</sub> during a 2 h anti-solvent reaction under different pressure at 25°C.

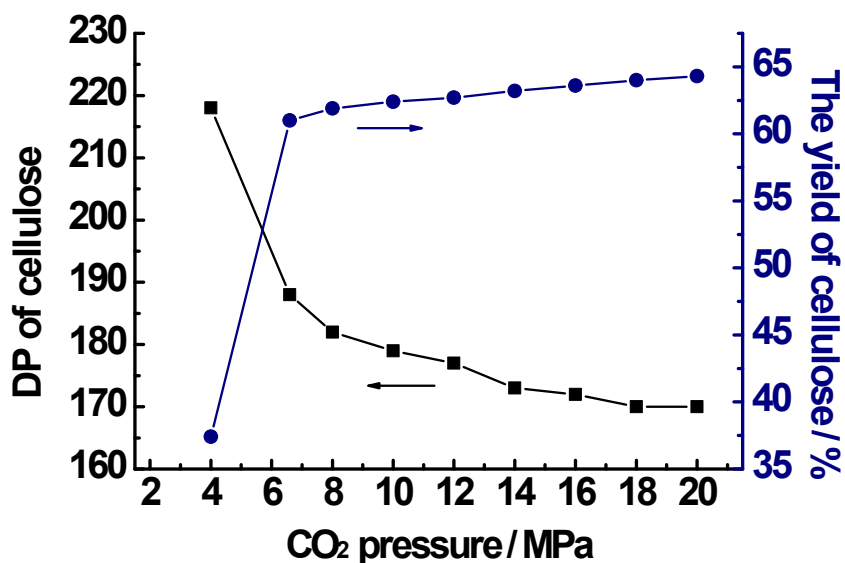

**Fig. S3** The DP value and yield of the regenerated cellulose obtained from the system of [Bmim]OAc/DMF (1:1(w/w))/MCC (10 wt%) by using compressed CO<sub>2</sub> during a 2 h anti-solvent reaction under different pressure at 25°C.

## Energy consumption comparison of methods with different anti-solvents

For the cost-efficient production, the desired bio-refinery process may demand minimal energy consumption and compatible with continuous mode. In this work, by compressing and depressurizing CO<sub>2</sub>, the cellulose can be regenerated and the CO<sub>2</sub> can be utilized circularly as well. Then, we give an approximate estimation on the energy consumption for comparing the methods by using compressed CO<sub>2</sub> and ethanol as anti-solvent. Let's take the system of 1 g [Bmim]OAc with 0.1 g MCC (10 wt%) as an example. We point it again that this is only an approximation.

For compressed CO<sub>2</sub>, we estimated the compression energy under the condition of 6.63 MPa at 25 °C. After finishing CO<sub>2</sub> loading, the system had a weight gain of 1.0352 g. In order to achieve the cellulose separation, we needed to compress 1.0352 g CO<sub>2</sub> (0.0235 mol) from 0.1 MPa to 6.63 MPa at 25 °C. The energy can be approximately calculated using the eqn:

$$W = -\int_{V_1}^{V_2} p_e dV = nRT \int_{V_2}^{V_1} \frac{1}{V} dV = nRT \ln \frac{V_1}{V_2} = nRT \ln \frac{p_2}{p_1}$$

which needs 244.6 J. Considering the extraction yield of 58.2 % after 3 h under this condition, 0.0582 g regenerated cellulose can be obtained. We can conclude that if we want to acquire 1 g regenerated cellulose by precipitation using 6.63 MPa compressed CO<sub>2</sub> at 25 °C, the energy of 4202.7 J might be consumed.

On the other hand, ethanol need be added 4 times as that of the volume of the IL, if cellulose was regenerated from the above system by anti-solvent ethanol completely. According to our measurement, the density of [Bmim]OAc and ethanol are 1.0488 g/mL and 0.7890 g/mL at 25 °C, respectively. It suggests that adding 3.009 g ethanol (0.0653 mol) was necessary. The enthalpy of vaporization of ethanol is  $4.25 \times 10^4$  J/mol at 25 °C. So if we remove ethanol from IL after extracting, the energy of 2775.3 J is consumed under this condition. In the meantime, through the extraction yield of 90.3 %, we can figure out the energy of 30734.2 J might be consumed when we obtain 1 g regenerated cellulose using ethanol as anti-solvent at 25 °C. It is over 7 times than that of using CO<sub>2</sub>, so we can conclude that using compressed CO<sub>2</sub> is more energy-efficient than using conventional high boiling-point solvents.

Although the method to estimate the energy consumption of the two processes is very approximate, the over 7 times energy consumption can still demonstrate that the compressed CO<sub>2</sub> anti-solvent process is more energy saving compared with the ethanol anti-solvent process. Since there are much less energy consumption, they can bring more benefits after covering the fixed costs required in compressed CO<sub>2</sub> anti-solvent process. So we can deem this process as energy-efficient.
